# Supplementary material for: Towards smart sustainable cities using Li-Fi technology: geo-location infrastructure utilizing LED street lights
Source: PeerJ journal article supplement (doi:10.7717/peerj-cs.1009), 2022-07-21
Supplement: Questionnaire.pdf [file Questionnaire.pdf]

| <b>Survey Questions</b>                |                                                                              |
|----------------------------------------|------------------------------------------------------------------------------|
| <b>Ease of Use and Learnability</b>    |                                                                              |
| <b>1</b>                               | It is easy to use                                                            |
| <b>2</b>                               | I easily remember how to use it                                              |
| <b>3</b>                               | It require the fewest steps possible to accomplish what I want to do with it |
| <b>Feedback and Errors</b>             |                                                                              |
| <b>4</b>                               | I can recover from mistakes quickly and easily                               |
| <b>5</b>                               | System messages are meaningful and jargon free                               |
| <b>6</b>                               | It makes it difficult to make mistakes                                       |
| <b>Consistency and Screen Displays</b> |                                                                              |
| <b>7</b>                               | I can easily identify where I am                                             |
| <b>8</b>                               | Suitable choice of screen and font colors                                    |
| <b>9</b>                               | Widgets locations and colors are consistent across displays                  |
| <b>10</b>                              | Wording is consistent across displays                                        |
| <b>11</b>                              | Icons and symbols reflects intended task                                     |
| <b>12</b>                              | I don't notice any inconsistencies as I use it                               |
| <b>Efficiency</b>                      |                                                                              |
| <b>13</b>                              | It does everything as I expect it to do                                      |
| <b>14</b>                              | Shifting among windows is easy                                               |
| <b>15</b>                              | Guidance information always available                                        |
| <b>16</b>                              | I successfully accomplished tasks every time                                 |
| <b>Subjective Satisfaction</b>         |                                                                              |
| <b>17</b>                              | I am overall satisfied with it                                               |
| <b>18</b>                              | It works the way I want it to work                                           |
| <b>19</b>                              | It is designed for all levels of users                                       |
