# Supplementary material for: Towards smart sustainable cities using Li-Fi technology: geo-location infrastructure utilizing LED street lights
Source: PeerJ journal article supplement (doi:10.7717/peerj-cs.1009), 2022-07-21
Supplement: QuestionnaireArabic.pdf [file QuestionnaireArabic.pdf]

| أسئلة الاستبيان         |                                                                 |
|-------------------------|-----------------------------------------------------------------|
| سهولة الاستخدام والتعلم |                                                                 |
| 1                       | هل التطبيق سهل الاستخدام                                        |
| 2                       | أنا بسهولة أتذكر كيفية استخدام التطبيق                          |
| 3                       | يتطلب التطبيق خطوات قليلة لتحقيق الخطوة المرجوة                 |
| الردود والأخطاء         |                                                                 |
| 4                       | استطيع التراجع عن أي خطأ بسهولة وسرعة                           |
| 5                       | رسائل التطبيق واضحة المعنى                                      |
| 6                       | من الصعب عمل أي خطأ عند استخدام التطبيق                         |
| الملائمة و عروض الشاشات |                                                                 |
| 7                       | أستطيع بسهولة تحديد مكاني في التطبيق                            |
| 8                       | شاشات التطبيق مناسبة وكذلك ألوان الخطوط المستخدمة               |
| 9                       | جميع مكونات التطبيق من حيث اماكنها والوانها واضحة وبنفس التنسيق |
| 10                      | الكلمات المستخدمة في التطبيق بنفس التنسيق في جميع شاشات العرض   |
| 11                      | الأزرار والرموز تعكس مهام التطبيق بوضوح                         |
| 12                      | لم ألاحظ أي مشكلة في الملائمة والتنسيق في كل شاشات التطبيق      |
| كفاءة التطبيق           |                                                                 |
| 13                      | تعلم مهام التطبيق بالطريقة المتوقعة منها                        |
| 14                      | التنقل بين شاشات التطبيق سهلة                                   |
| 15                      | معلومات ارشاد الاستخدام دائما متاحة                             |
| 16                      | قمت بإتمام مهام التطبيق بنجاح في كل مرة                         |
| الرضا عن التطبيق        |                                                                 |
| 17                      | أنا راضي عن التطبيق بشكل عام                                    |
| 18                      | يعمل التطبيق بالطريقة المتوقعة منه                              |
| 19                      | تم تصميم التطبيق لمستويات مختلفة من المستخدمين                  |
