# Supplementary material for: Towards smart sustainable cities using Li-Fi technology: geo-location infrastructure utilizing LED street lights
Source: PeerJ Comput Sci. 2022 Jul 21;8:e1009. doi: 10.7717/peerj-cs.1009 (PMC9454865; doi:10.7717/peerj-cs.1009)
Supplement: Supplemental Information 2 [file peerj-cs-08-1009-s002.xlsx]

## Sheet: Sheet1
Function	Average time in Second
Add region	53.48
Update region	23
Delete region	33.48
Add LED	128.68
Update LED	24.4
Delete LED	74.64
Add content	88
Update content	48.8
Delete content	67.76
Function	Average time in Second
Upload content	29.4
View users' content	4
View admins' content	5.2
save content to favorite list	3.3
view all regions	2
view specific region	2.2
